# Supplementary material for: Magnetic-Propelled Janus Yeast Cell Robots Functionalized with Metal-Organic Frameworks for Mycotoxin Decontamination
Source: MDPI journal article supplement (doi:10.3390/mi12070797), 2021-07-05
Supplement: s1 [file s1]

## Supporting Information

### **Magnetic-propelled Janus yeast cell robots functionalized with metal-organic frameworks for mycotoxin decontamination**

Dongdong Lu <sup>1,3,4</sup>, Songsong Tang <sup>2,\*</sup>, Yangyang Li <sup>3</sup>, Zhaoqing Cong <sup>3</sup>, Xueji Zhang <sup>2</sup>, and  
Song Wu <sup>1,3,4,\*</sup>

**Movie S1:** Propulsion performance of the JYC-robot and FC-yeast under a rotating magnetic field at the amplitude of 0.5 V.

**Movie S2:** Propulsion performance of the JYC-robot and FC-yeast under a rotating magnetic field at the frequency of 15 Hz.

**Movie S3:** Propulsion performance of JYC-robots in various media under a rotating magnetic field (0.4 V, 16 Hz).

**Movie S4:** Propulsion performance of FC-yeasts in various media under a rotating magnetic field (0.4 V, 16 Hz).

**Movie S5:** Motion trajectory of a JYC-robot under the rotating magnetic field with a predefined path of square-like shape (□) (RMF: 0.4V and 16 Hz).

**Supporting Figures:**

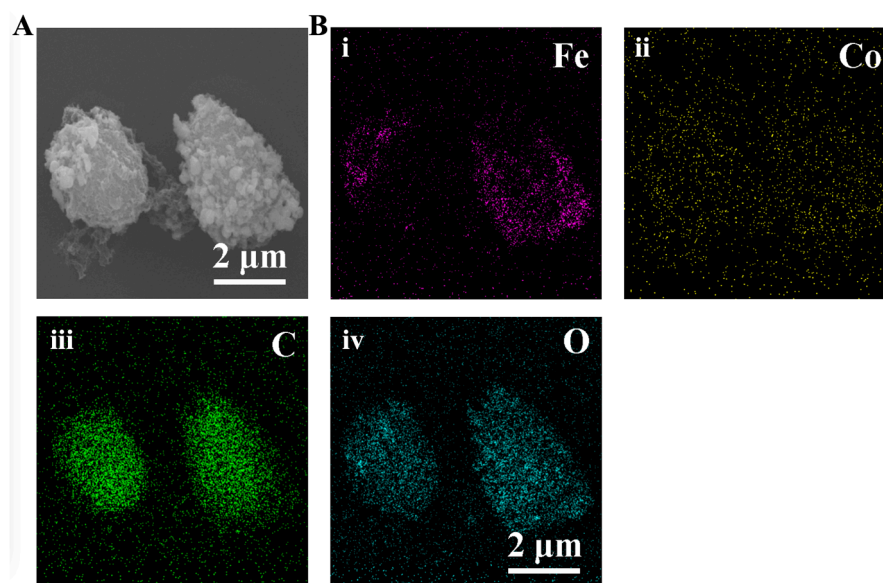

**Figure S1.** SEM and EDX images of two JYC-robots.

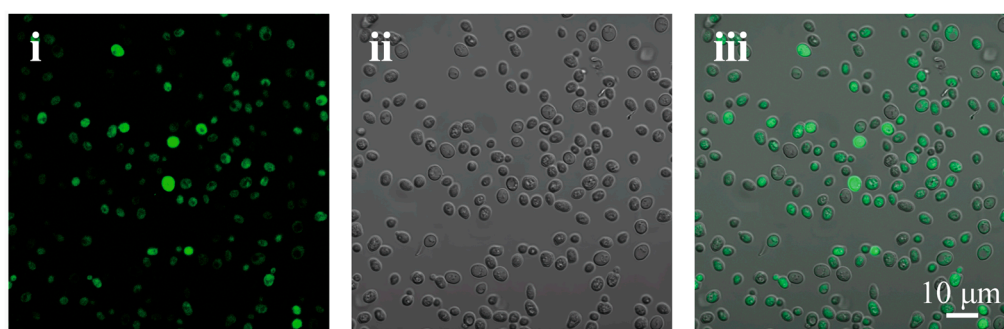

**Figure S2.** CLSM images of JYC-robots with FDA staining: i: FDA channel; ii: bright-field channel, iii: merged image of FDA and bright-field channels.

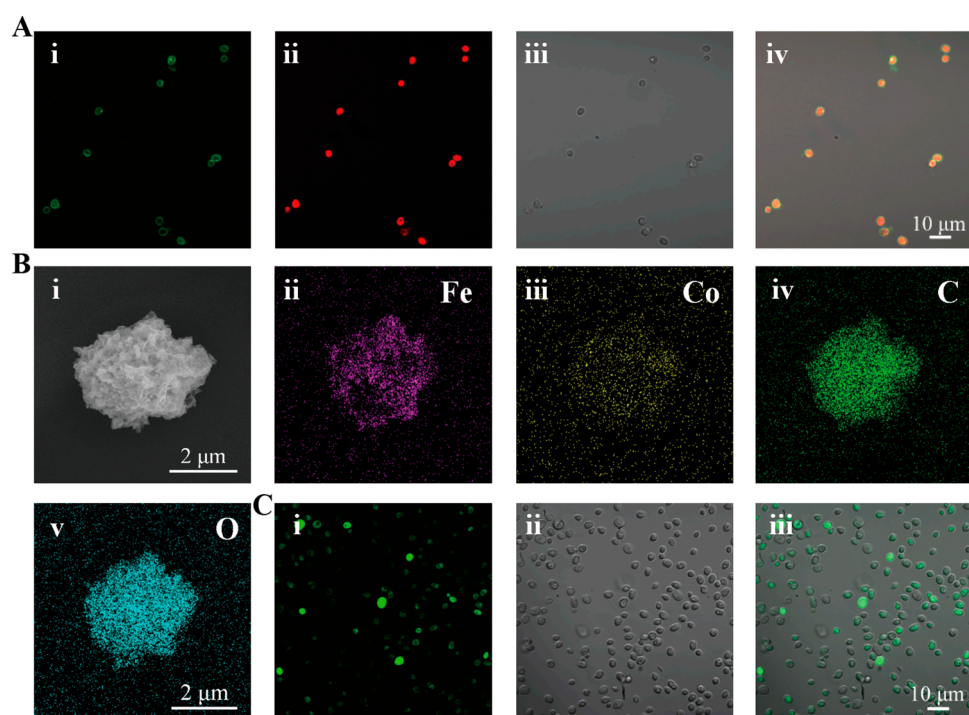

**Figure S3.** Characterization of FC-yeasts. (A) CLSM images of FC-yeasts: i: FITC channel; ii: RhB channel; iii: bright-field; iv: merged image of FITC, RhB, and bright-field channels. (B) SEM and corresponding EDX images of the FC-yeast. (C) CLSM images of FC-yeasts with FDA staining: i: FDA channel; ii: bright-field; iii: merged image of FDA and bright-field channels.

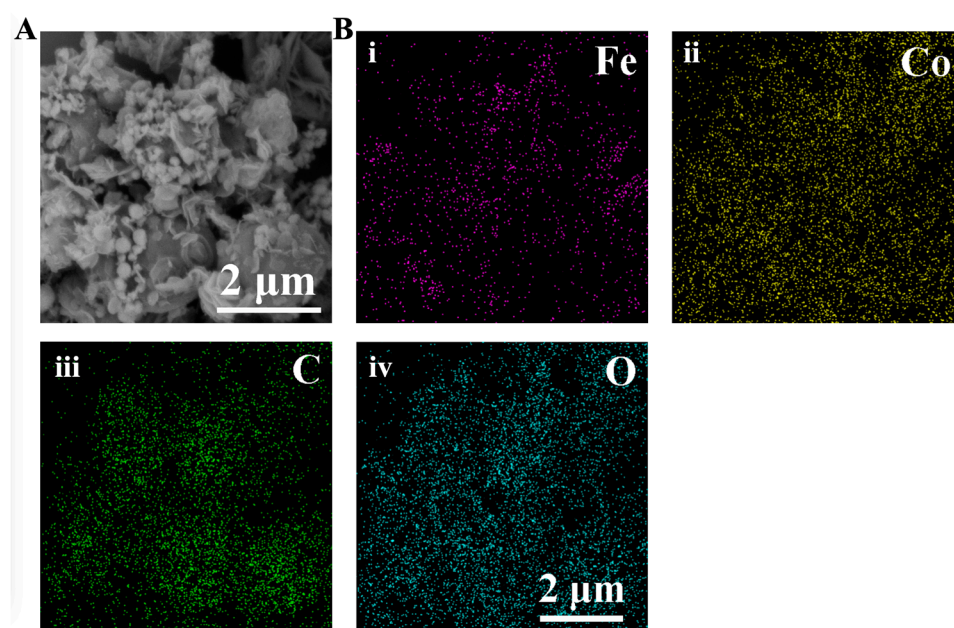

**Figure S4.** SEM and EDX images of multiple FC-yeasts.

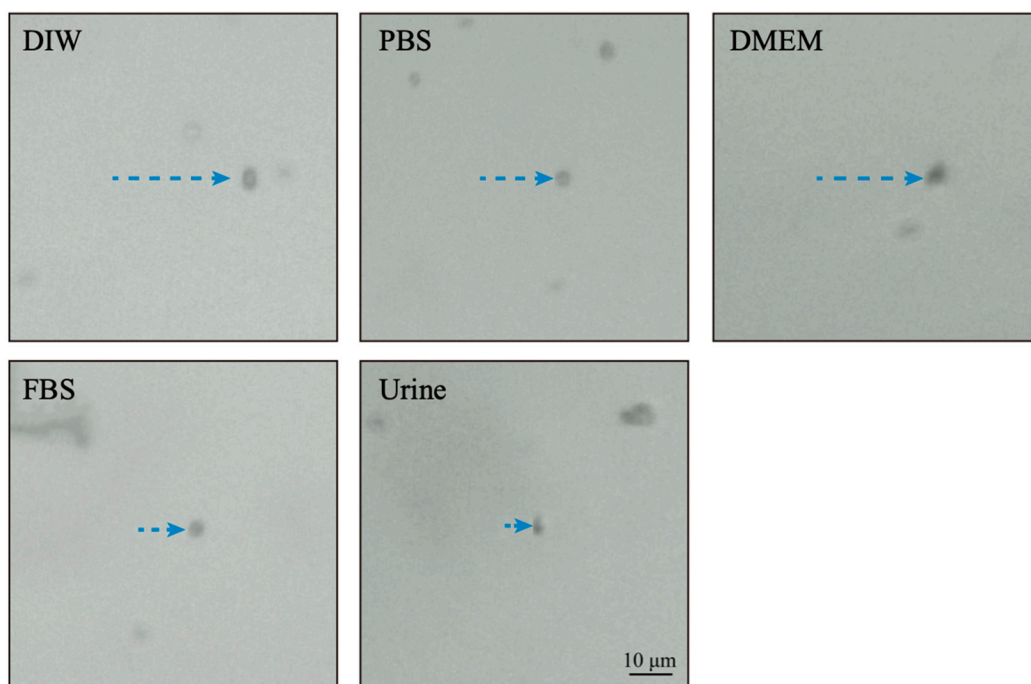

**Figure S5.** Motion trajectories over 5 s of JYC-robots in various media under the RMF (0.4 V, 16 Hz, taken from movie S3).

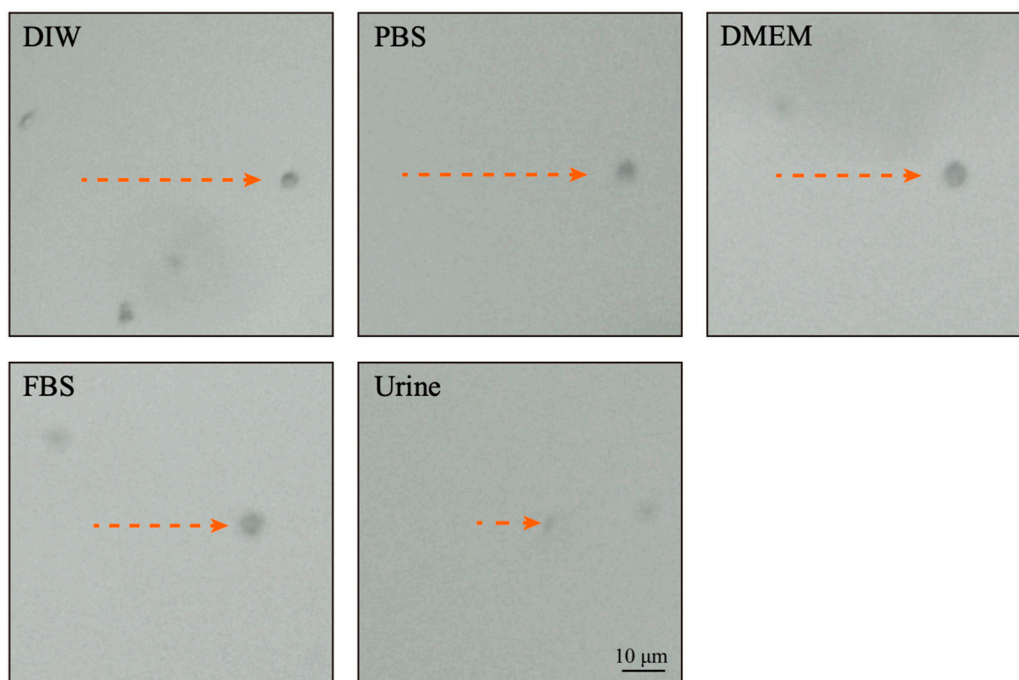

**Figure S6.** Motion trajectories over 5 s of FC-yeasts in various media under the RMF (0.4 V, 16 Hz, taken from movie S4).

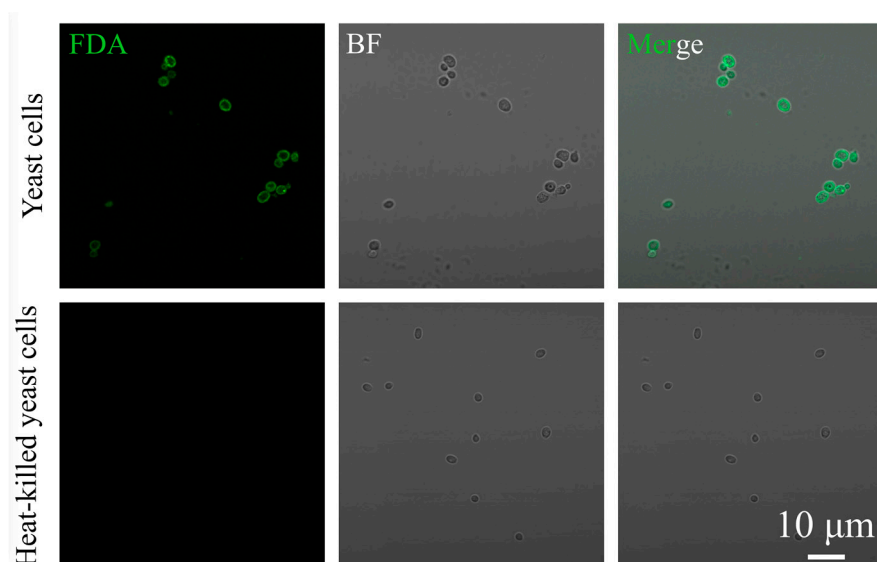

**Figure S7.** CLSM images of yeast cells and heat-killed yeast cells with FDA staining. BF: bright-field.

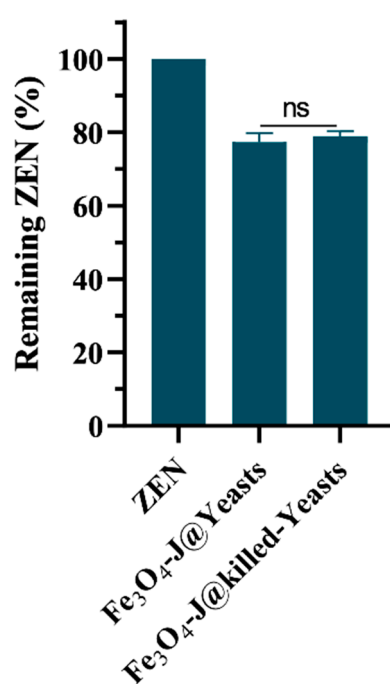

**Figure S8.** ZEN removal after incubated with Fe<sub>3</sub>O<sub>4</sub>-J@Yeasts and Fe<sub>3</sub>O<sub>4</sub>-J@killed-Yeasts for 2 min. n=3, mean ± SD.

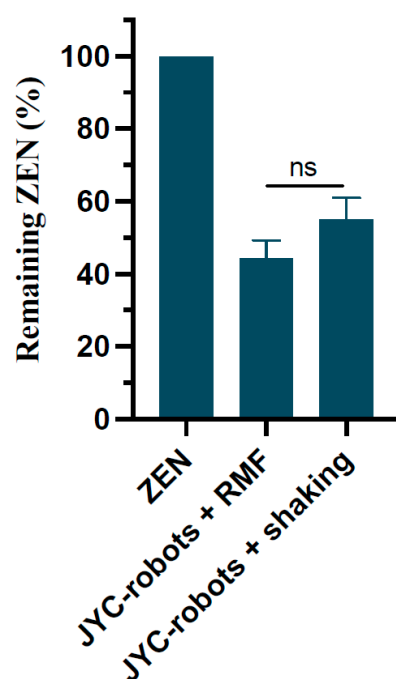

**Figure S9.** ZEN removal after incubated with JYC-robots under RMF (JYC-robots + RMF) or shaking (JYC-robots + shaking) for 2 min. n=3, mean  $\pm$  SD.

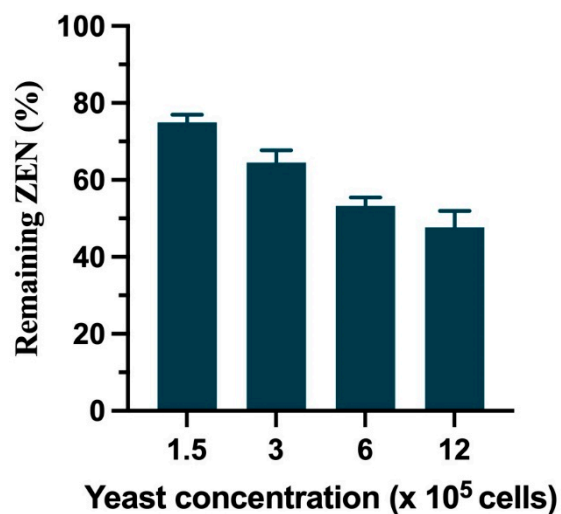

**Figure S10.** ZEN removal after incubated with yeast cells upon different concentrations for 2 min. n=3, mean  $\pm$  SD.
