# Supplementary material for: Magnetic-Propelled Janus Yeast Cell Robots Functionalized with Metal-Organic Frameworks for Mycotoxin Decontamination
Source: Micromachines (Basel). 2021 Jul 5;12(7):797. doi: 10.3390/mi12070797 (PMC8307641; doi:10.3390/mi12070797)
Supplement: Supplementary file 1 [file micromachines-12-00797-s001.zip]

Archive with 6 entries (6 files):
- movie_S1.mp4
- movie_S2.mp4
- movie_S3.mp4
- movie_S4.mp4
- movie_S5.mp4
- Supporting.pdf
